# Supplementary material for: MicroRNA expression profiling in PBMCs of Indian water Buffalo (Bubalus bubalis) infected with Brucella and Johne’s disease
Source: ExRNA. 2020 May 22;2(1):8. doi: 10.1186/s41544-020-00049-y (PMC7242893; doi:10.1186/s41544-020-00049-y)
Supplement: Supplementary file 4 — Additional file 4. [file 41544_2020_49_MOESM4_ESM.csv]

	Brucellosis_Murrah						JD_Murrah							Healthy_Murrah
SN	microRNA	Unique_Reads	Read-Count	log_Normalized_ReadCount		SN	microRNA	Unique_Reads	Read-Count	log_Normalized_ReadCount			SN	microRNA	Unique_Reads	Read-Count	log_Normalized_ReadCount
1	bta-let-7a-3p	3	4	0.64725		1	bta-let-7a-3p	3	4	0.80891			1	bta-let-7a-3p	4	4	4.21495
2	bta-let-7a-5p	43	2032	6.87773		2	bta-let-7a-5p	60	1017	6.34723			2	bta-let-7a-5p	61	3739	11.05523
3	bta-let-7b	53	341	5.09284		3	bta-let-7b	49	268	5.0136			3	bta-let-7b	60	407	8.83747
4	bta-let-7c	10	20	2.25669		4	bta-let-7c	8	14	2.06167			4	bta-let-7c	12	43	6.58986
5	bta-let-7d	20	180	4.45392		5	bta-let-7d	16	101	4.03774			5	bta-let-7d	38	455	8.94896
6	bta-let-7e	14	48	3.13216		6	bta-let-7e	8	20	2.41835			6	bta-let-7e	11	43	6.58986
7	bta-let-7f	87	1670	6.68154		7	bta-let-7f	76	900	6.22501			7	bta-let-7f	117	3703	11.04556
8	bta-let-7g	73	1308	6.43721		8	bta-let-7g	60	806	6.1147			8	bta-let-7g	101	2618	10.69883
9	bta-let-7i	23	159	4.32986		9	bta-let-7i	20	88	3.89995			9	bta-let-7i	43	535	9.11093
10	bta-miR-1	5	21	2.30548		10	bta-miR-1	3	14	2.06167			10	bta-miR-1	8	58	6.8891
11	bta-miR-100	1	1	-0.73904		11	bta-miR-101	11	88	3.89995			11	bta-miR-100	1	1	2.82866
12	bta-miR-101	21	178	4.44274		12	bta-miR-103	33	1406	6.67112			12	bta-miR-101	23	236	8.29249
13	bta-miR-103	36	1432	6.52779		13	bta-miR-106a	11	83	3.84146			13	bta-miR-103	40	1711	10.27349
14	bta-miR-106a	17	101	3.87608		14	bta-miR-106b	27	277	5.04663			14	bta-miR-106a	11	21	5.87318
15	bta-miR-106b	50	648	5.73485		15	bta-miR-107	12	90	3.92243			15	bta-miR-106b	30	303	8.54239
16	bta-miR-107	15	94	3.80425		16	bta-miR-10a	3	7	1.36853			16	bta-miR-107	13	118	7.59934
17	bta-miR-10a	4	9	1.45818		17	bta-miR-10b	1	1	-0.57738			17	bta-miR-10a	4	7	4.77457
18	bta-miR-10b	1	1	-0.73904		18	bta-miR-1246	3	23	2.55811			18	bta-miR-10b	2	2	3.52181
19	bta-miR-1246	1	1	-0.73904		19	bta-miR-1248	1	30	2.82381			19	bta-miR-1249	2	2	3.52181
20	bta-miR-1248	2	2	-0.04589		20	bta-miR-125a	15	197	4.70582			20	bta-miR-125a	27	224	8.24031
21	bta-miR-1249	1	1	-0.73904		21	bta-miR-125b	8	158	4.48521			21	bta-miR-125b	24	319	8.59385
22	bta-miR-125a	19	213	4.62225		22	bta-miR-1260b	5	6	1.21438			22	bta-miR-1260b	17	1049	9.78425
23	bta-miR-125b	17	212	4.61754		23	bta-miR-1271	1	1	-0.57738			23	bta-miR-126-3p	2	3	3.92727
24	bta-miR-1260b	16	1239	6.38302		24	bta-miR-128	12	22	2.51366			24	bta-miR-128	7	19	5.7731
25	bta-miR-1271	2	2	-0.04589		25	bta-miR-129-3p	2	8	1.50206			25	bta-miR-129-3p	6	10	5.13124
26	bta-miR-128	15	78	3.61767		26	bta-miR-1296	1	1	-0.57738			26	bta-miR-1306	7	29	6.19596
27	bta-miR-129-3p	2	9	1.45818		27	bta-miR-1306	4	14	2.06167			27	bta-miR-1307	13	34	6.35502
28	bta-miR-1296	1	1	-0.73904		28	bta-miR-1307	13	43	3.18382			28	bta-miR-130a	4	5	4.4381
29	bta-miR-1306	10	38	2.89854		29	bta-miR-130a	5	11	1.82051			29	bta-miR-130b	19	30	6.22986
30	bta-miR-1307	16	46	3.0896		30	bta-miR-130b	23	77	3.76642			30	bta-miR-132	1	1	2.82866
31	bta-miR-130a	8	14	1.90002		31	bta-miR-132	3	3	0.52123			31	bta-miR-133a	1	2	3.52181
32	bta-miR-130b	25	84	3.69178		32	bta-miR-133a	2	3	0.52123			32	bta-miR-1343-3p	1	1	2.82866
33	bta-miR-132	4	4	0.64725		33	bta-miR-1343-3p	1	1	-0.57738			33	bta-miR-136	1	1	2.82866
34	bta-miR-133a	4	6	1.05272		34	bta-miR-138	53	593	5.80781			34	bta-miR-138	43	225	8.24476
35	bta-miR-1343-3p	2	3	0.35957		35	bta-miR-1388-3p	5	15	2.13067			35	bta-miR-1388-3p	7	11	5.22656
36	bta-miR-138	91	684	5.78892		36	bta-miR-1388-5p	2	4	0.80891			36	bta-miR-1388-5p	4	6	4.62042
37	bta-miR-1388-3p	12	22	2.352		37	bta-miR-139	3	6	1.21438			37	bta-miR-139	1	1	2.82866
38	bta-miR-1388-5p	3	7	1.20687		38	bta-miR-140	187	2746	7.34052			38	bta-miR-140	168	2154	10.50374
39	bta-miR-139	4	8	1.3404		39	bta-miR-141	6	8	1.50206			39	bta-miR-141	2	3	3.92727
40	bta-miR-140	229	3198	7.33124		40	bta-miR-142-3p	27	238	4.89489			40	bta-miR-142-3p	27	160	7.90383
41	bta-miR-141	6	8	1.3404		41	bta-miR-142-5p	18	99	4.01774			41	bta-miR-142-5p	26	123	7.64084
42	bta-miR-142-3p	38	289	4.92738		42	bta-miR-1434-5p	200	12077	8.82167			42	bta-miR-143	1	1	2.82866
43	bta-miR-142-5p	40	317	5.01986		43	bta-miR-145	1	1	-0.57738			43	bta-miR-1434-5p	1	1	2.82866
44	bta-miR-1434-5p	168	300	4.96474		44	bta-miR-1468	1	1	-0.57738			44	bta-miR-145	2	2	3.52181
45	bta-miR-145	2	3	0.35957		45	bta-miR-146a	8	28	2.75482			45	bta-miR-146a	7	82	7.23538
46	bta-miR-1468	2	2	-0.04589		46	bta-miR-147	8	22	2.51366			46	bta-miR-146b	3	5	4.4381
47	bta-miR-146a	7	56	3.28631		47	bta-miR-148a	8	24	2.60067			47	bta-miR-147	17	60	6.923
48	bta-miR-146b	1	1	-0.73904		48	bta-miR-148b	9	29	2.78991			48	bta-miR-148a	14	51	6.76049
49	bta-miR-147	12	29	2.62825		49	bta-miR-150	104	3005	7.43065			49	bta-miR-148b	10	22	5.9197
50	bta-miR-148a	9	37	2.87188		50	bta-miR-151-3p	4	8	1.50206			50	bta-miR-150	150	8668	11.89605
51	bta-miR-148b	12	37	2.87188		51	bta-miR-151-5p	27	348	5.27482			51	bta-miR-151-3p	7	13	5.39361
52	bta-miR-150	146	5258	7.82846		52	bta-miR-152	1	1	-0.57738			52	bta-miR-151-5p	37	525	9.09206
53	bta-miR-151-3p	5	9	1.45818		53	bta-miR-153	1	1	-0.57738			53	bta-miR-152	3	4	4.21495
54	bta-miR-151-5p	43	1017	6.18557		54	bta-miR-154c	1	1	-0.57738			54	bta-miR-155	15	34	6.35502
55	bta-miR-152	1	1	-0.73904		55	bta-miR-155	18	50	3.33464			55	bta-miR-15a	79	809	9.52446
56	bta-miR-153	1	1	-0.73904		56	bta-miR-15a	46	350	5.28055			56	bta-miR-15b	69	975	9.7111
57	bta-miR-154c	1	1	-0.73904		57	bta-miR-15b	84	881	6.20367			57	bta-miR-16a	71	1160	9.88484
58	bta-miR-155	22	64	3.41984		58	bta-miR-16a	54	640	5.88408			58	bta-miR-16b	43	650	9.30563
59	bta-miR-15a	88	1100	6.26402		59	bta-miR-16b	59	1538	6.76085			59	bta-miR-17-3p	19	47	6.67881
60	bta-miR-15b	76	1270	6.40773		60	bta-miR-17-3p	10	25	2.64149			60	bta-miR-17-5p	27	132	7.71146
61	bta-miR-16a	47	1374	6.48644		61	bta-miR-17-5p	30	383	5.37065			61	bta-miR-181a	75	1195	9.91456
62	bta-miR-16b	60	1728	6.71568		62	bta-miR-181a	30	525	5.68601			62	bta-miR-181b	20	57	6.87171
63	bta-miR-17-3p	17	49	3.15278		63	bta-miR-181b	10	26	2.68071			63	bta-miR-181c	14	49	6.72048
64	bta-miR-17-5p	42	506	5.48749		64	bta-miR-181c	8	24	2.60067			64	bta-miR-1839	6	15	5.53671
65	bta-miR-181a	46	587	5.63598		65	bta-miR-1839	5	9	1.61984			65	bta-miR-185	29	177	8.00481
66	bta-miR-181b	15	36	2.84448		66	bta-miR-185	29	228	4.85196			66	bta-miR-186	19	53	6.79895
67	bta-miR-181c	14	39	2.92452		67	bta-miR-186	31	188	4.65906			67	bta-miR-188	1	1	2.82866
68	bta-miR-1839	11	16	2.03355		68	bta-miR-188	3	5	1.03205			68	bta-miR-18a	14	134	7.7265
69	bta-miR-185	34	259	4.81779		69	bta-miR-18a	18	250	4.94408			69	bta-miR-18b	3	6	4.62042
70	bta-miR-186	47	251	4.78641		70	bta-miR-18b	3	10	1.7252			70	bta-miR-191	239	10424	12.08053
71	bta-miR-188	5	7	1.20687		71	bta-miR-191	242	10584	8.68971			71	bta-miR-192	31	172	7.97615
72	bta-miR-18a	22	317	5.01986		72	bta-miR-192	17	72	3.69928			72	bta-miR-193a-3p	2	2	3.52181
73	bta-miR-18b	5	15	1.96901		73	bta-miR-193a-3p	2	3	0.52123			73	bta-miR-193a-5p	8	26	6.08676
74	bta-miR-190b	1	1	-0.73904		74	bta-miR-193a-5p	11	40	3.1115			74	bta-miR-193b	3	6	4.62042
75	bta-miR-191	308	13362	8.76113		75	bta-miR-193b	5	12	1.90752			75	bta-miR-194	7	30	6.22986
76	bta-miR-192	27	111	3.97049		76	bta-miR-194	6	38	3.0602			76	bta-miR-195	4	9	5.02588
77	bta-miR-193a-3p	4	5	0.8704		77	bta-miR-1940	1	1	-0.57738			77	bta-miR-196b	1	1	2.82866
78	bta-miR-193a-5p	13	42	2.99863		78	bta-miR-195	4	7	1.36853			78	bta-miR-197	10	49	6.72048
79	bta-miR-193b	6	13	1.82591		79	bta-miR-197	9	62	3.54975			79	bta-miR-199a-3p	1	1	2.82866
80	bta-miR-194	7	48	3.13216		80	bta-miR-19a	21	525	5.68601			80	bta-miR-19a	43	500	9.04327
81	bta-miR-195	5	9	1.45818		81	bta-miR-19b	74	3537	7.59365			81	bta-miR-19b	139	6800	11.65334
82	bta-miR-196b	1	1	-0.73904		82	bta-miR-200c	4	7	1.36853			82	bta-miR-200c	1	1	2.82866
83	bta-miR-197	11	83	3.6798		83	bta-miR-205	1	1	-0.57738			83	bta-miR-206	1	1	2.82866
84	bta-miR-19a	32	628	5.7035		84	bta-miR-20a	48	707	5.98365			84	bta-miR-20a	21	171	7.97032
85	bta-miR-19b	102	4371	7.64371		85	bta-miR-20b	7	25	2.64149			85	bta-miR-20b	7	9	5.02588
86	bta-miR-200c	5	10	1.56354		86	bta-miR-210	14	29	2.78991			86	bta-miR-210	9	21	5.87318
87	bta-miR-205	1	1	-0.73904		87	bta-miR-211	3	3	0.52123			87	bta-miR-211	3	6	4.62042
88	bta-miR-20a	72	844	5.99911		88	bta-miR-215	1	1	-0.57738			88	bta-miR-215	3	3	3.92727
89	bta-miR-20b	11	32	2.72669		89	bta-miR-21-5p	110	4840	7.90729			89	bta-miR-21-5p	282	18717	12.66585
90	bta-miR-210	16	33	2.75747		90	bta-miR-221	19	83	3.84146			90	bta-miR-221	34	329	8.62472
91	bta-miR-211	3	6	1.05272		91	bta-miR-222	13	20	2.41835			91	bta-miR-222	19	87	7.29457
92	bta-miR-21-3p	2	2	-0.04589		92	bta-miR-223	117	2325	7.17409			92	bta-miR-223	157	3710	11.04745
93	bta-miR-215	2	2	-0.04589		93	bta-miR-22-3p	10	106	4.08606			93	bta-miR-22-3p	13	110	7.52914
94	bta-miR-21-5p	116	6381	8.02204		94	bta-miR-22-5p	1	5	1.03205			94	bta-miR-22-5p	3	7	4.77457
95	bta-miR-221	31	143	4.2238		95	bta-miR-2284j	7	9	1.61984			95	bta-miR-2284b	1	1	2.82866
96	bta-miR-222	18	50	3.17298		96	bta-miR-2284x	9	22	2.51366			96	bta-miR-2284j	6	8	4.9081
97	bta-miR-223	174	3073	7.29137		97	bta-miR-2285aa	8	10	1.7252			97	bta-miR-2284x	9	12	5.31357
98	bta-miR-22-3p	20	141	4.20972		98	bta-miR-2285c	2	3	0.52123			98	bta-miR-2284y	1	1	2.82866
99	bta-miR-22-5p	2	9	1.45818		99	bta-miR-2285e	1	1	-0.57738			99	bta-miR-2285aa	4	8	4.9081
100	bta-miR-2284j	7	9	1.45818		100	bta-miR-2285k	2	2	0.11576			100	bta-miR-2285ad	1	1	2.82866
101	bta-miR-2284t-3p	1	1	-0.73904		101	bta-miR-2285n	6	6	1.21438			101	bta-miR-2285c	4	5	4.4381
102	bta-miR-2284w	2	2	-0.04589		102	bta-miR-2285o	1	1	-0.57738			102	bta-miR-2285e	2	3	3.92727
103	bta-miR-2284x	21	58	3.3214		103	bta-miR-2285p	1	2	0.11576			103	bta-miR-2285f	2	2	3.52181
104	bta-miR-2285aa	9	12	1.74586		104	bta-miR-2285u	4	6	1.21438			104	bta-miR-2285n	3	4	4.21495
105	bta-miR-2285c	4	11	1.65885		105	bta-miR-2285x	2	2	0.11576			105	bta-miR-2285o	2	2	3.52181
106	bta-miR-2285e	3	4	0.64725		106	bta-miR-2285y	5	8	1.50206			106	bta-miR-2285u	1	2	3.52181
107	bta-miR-2285f	1	1	-0.73904		107	bta-miR-2312	12	44	3.20681			107	bta-miR-2285x	2	8	4.9081
108	bta-miR-2285j	1	1	-0.73904		108	bta-miR-2313-5p	1	1	-0.57738			108	bta-miR-2285y	3	7	4.77457
109	bta-miR-2285k	2	2	-0.04589		109	bta-miR-2331-3p	3	4	0.80891			109	bta-miR-2285z	1	1	2.82866
110	bta-miR-2285n	7	7	1.20687		110	bta-miR-2331-5p	1	1	-0.57738			110	bta-miR-2312	7	13	5.39361
111	bta-miR-2285o	1	1	-0.73904		111	bta-miR-2335	5	7	1.36853			111	bta-miR-2331-3p	9	19	5.7731
112	bta-miR-2285p	1	2	-0.04589		112	bta-miR-2340	32	2722	7.33174			112	bta-miR-2331-5p	2	2	3.52181
113	bta-miR-2285u	6	8	1.3404		113	bta-miR-23a	65	880	6.20254			113	bta-miR-2340	5	7	4.77457
114	bta-miR-2285x	2	2	-0.04589		114	bta-miR-23b-3p	24	244	4.91978			114	bta-miR-23a	52	754	9.45405
115	bta-miR-2285y	5	8	1.3404		115	bta-miR-24	2	6	1.21438			115	bta-miR-23b-3p	21	197	8.11186
116	bta-miR-2312	19	60	3.3553		116	bta-miR-2404	1	4	0.80891			116	bta-miR-24	3	5	4.4381
117	bta-miR-2313-5p	1	1	-0.73904		117	bta-miR-2411-3p	1	1	-0.57738			117	bta-miR-2419-3p	2	2	3.52181
118	bta-miR-2317	1	1	-0.73904		118	bta-miR-2419-5p	8	53	3.39291			118	bta-miR-2419-5p	16	194	8.09652
119	bta-miR-2318	1	1	-0.73904		119	bta-miR-2427	1	2	0.11576			119	bta-miR-2435	7	8	4.9081
120	bta-miR-2331-3p	5	6	1.05272		120	bta-miR-2435	9	24	2.60067			120	bta-miR-24-3p	58	659	9.31938
121	bta-miR-2331-5p	1	1	-0.73904		121	bta-miR-24-3p	47	737	6.0252			121	bta-miR-2468	2	2	3.52181
122	bta-miR-2335	9	10	1.56354		122	bta-miR-2440	6	76	3.75335			122	bta-miR-2478	17	340	8.65761
123	bta-miR-2340	11	55	3.26829		123	bta-miR-2484	178	74665	10.64338			123	bta-miR-2483-3p	1	1	2.82866
124	bta-miR-2355-3p	1	1	-0.73904		124	bta-miR-2487	7	13	1.98757			124	bta-miR-2484	13	19	5.7731
125	bta-miR-2383	1	1	-0.73904		125	bta-miR-25	9	39	3.08618			125	bta-miR-25	10	42	6.56633
126	bta-miR-23a	81	1333	6.45615		126	bta-miR-26a	123	2922	7.40264			126	bta-miR-26a	168	3044	10.84959
127	bta-miR-23b-3p	37	338	5.084		127	bta-miR-26b	44	257	4.97169			127	bta-miR-26b	47	495	9.03322
128	bta-miR-24	1	4	0.64725		128	bta-miR-27a-3p	55	176	4.5931			128	bta-miR-27a-3p	65	654	9.31177
129	bta-miR-2411-3p	1	1	-0.73904		129	bta-miR-27a-5p	1	1	-0.57738			129	bta-miR-27a-5p	5	11	5.22656
130	bta-miR-2419-3p	1	1	-0.73904		130	bta-miR-27b	10	26	2.68071			130	bta-miR-27b	12	55	6.83599
131	bta-miR-2419-5p	8	69	3.49506		131	bta-miR-28	12	22	2.51366			131	bta-miR-28	16	54	6.81764
132	bta-miR-2435	11	31	2.69495		132	bta-miR-2887	6	53	3.39291			132	bta-miR-2903	1	1	2.82866
133	bta-miR-24-3p	62	793	5.93678		133	bta-miR-2903	1	1	-0.57738			133	bta-miR-296-3p	7	14	5.46772
134	bta-miR-2440	5	5	0.8704		134	bta-miR-2904	7	43	3.18382			134	bta-miR-29a	122	2267	10.55487
135	bta-miR-2468	1	1	-0.73904		135	bta-miR-296-3p	8	21	2.46714			135	bta-miR-29b	67	2117	10.48641
136	bta-miR-2478	7	192	4.51845		136	bta-miR-296-5p	3	4	0.80891			136	bta-miR-29c	23	221	8.22682
137	bta-miR-2484	220	1038	6.20601		137	bta-miR-29a	141	1834	6.93687			137	bta-miR-29d-3p	7	11	5.22656
138	bta-miR-2487	6	8	1.3404		138	bta-miR-29b	76	3040	7.44223			138	bta-miR-29d-5p	18	39	6.49222
139	bta-miR-25	11	52	3.2122		139	bta-miR-29c	61	882	6.20481			139	bta-miR-29e	1	1	2.82866
140	bta-miR-26a	171	3305	7.36415		140	bta-miR-29d-3p	3	3	0.52123			140	bta-miR-301a	19	110	7.52914
141	bta-miR-26b	53	569	5.60484		141	bta-miR-29d-5p	13	46	3.25126			141	bta-miR-301b	2	3	3.92727
142	bta-miR-27a-3p	67	619	5.68906		142	bta-miR-301a	9	48	3.29382			142	bta-miR-30a-5p	9	19	5.7731
143	bta-miR-27a-5p	2	2	-0.04589		143	bta-miR-301b	2	2	0.11576			143	bta-miR-30b-5p	25	400	8.82012
144	bta-miR-27b	14	55	3.26829		144	bta-miR-30a-5p	8	30	2.82381			144	bta-miR-30c	48	638	9.287
145	bta-miR-28	16	57	3.30401		145	bta-miR-30b-3p	1	1	-0.57738			145	bta-miR-30d	65	1799	10.32365
146	bta-miR-2887	5	5	0.8704		146	bta-miR-30b-5p	20	346	5.26905			146	bta-miR-30e-5p	33	165	7.93461
147	bta-miR-2903	1	1	-0.73904		147	bta-miR-30c	41	718	5.99909			147	bta-miR-30f	4	4	4.21495
148	bta-miR-2904	1	1	-0.73904		148	bta-miR-30d	55	1499	6.73517			148	bta-miR-31	32	242	8.3176
149	bta-miR-296-3p	12	28	2.59316		149	bta-miR-30e-5p	46	629	5.86675			149	bta-miR-32	10	56	6.85401
150	bta-miR-296-5p	7	12	1.74586		150	bta-miR-30f	2	2	0.11576			150	bta-miR-320a	36	81	7.22311
151	bta-miR-29a	147	3773	7.49658		151	bta-miR-31	9	31	2.8566			151	bta-miR-324	5	7	4.77457
152	bta-miR-29b	85	3418	7.39777		152	bta-miR-32	7	25	2.64149			152	bta-miR-326	15	81	7.22311
153	bta-miR-29c	59	1378	6.48935		153	bta-miR-320a	71	294	5.1062			153	bta-miR-328	3	3	3.92727
154	bta-miR-29d-3p	7	9	1.45818		154	bta-miR-324	5	18	2.31299			154	bta-miR-330	10	21	5.87318
155	bta-miR-29d-5p	21	68	3.48047		155	bta-miR-326	11	37	3.03353			155	bta-miR-331-3p	16	23	5.96415
156	bta-miR-301a	11	51	3.19278		156	bta-miR-330	4	11	1.82051			156	bta-miR-331-5p	4	6	4.62042
157	bta-miR-301b	2	2	-0.04589		157	bta-miR-331-3p	1	2	0.11576			157	bta-miR-338	2	3	3.92727
158	bta-miR-30a-5p	10	35	2.81631		158	bta-miR-331-5p	1	1	-0.57738			158	bta-miR-339a	32	562	9.16016
159	bta-miR-30b-3p	2	2	-0.04589		159	bta-miR-335	1	1	-0.57738			159	bta-miR-33a	6	16	5.60125
160	bta-miR-30b-5p	27	449	5.36798		160	bta-miR-338	3	6	1.21438			160	bta-miR-33b	2	2	3.52181
161	bta-miR-30c	45	776	5.91511		161	bta-miR-339a	49	514	5.66484			161	bta-miR-340	1	2	3.52181
162	bta-miR-30d	80	2014	6.86884		162	bta-miR-33a	2	2	0.11576			162	bta-miR-342	63	902	9.63327
163	bta-miR-30e-5p	61	683	5.78745		163	bta-miR-340	4	6	1.21438			163	bta-miR-3431	1	1	2.82866
164	bta-miR-30f	2	2	-0.04589		164	bta-miR-342	105	3453	7.56961			164	bta-miR-345-3p	1	1	2.82866
165	bta-miR-31	15	56	3.28631		165	bta-miR-3432	6	10	1.7252			165	bta-miR-345-5p	13	77	7.17247
166	bta-miR-3141	1	1	-0.73904		166	bta-miR-345-5p	9	21	2.46714			166	bta-miR-34a	9	25	6.04754
167	bta-miR-32	13	78	3.61767		167	bta-miR-34a	4	10	1.7252			167	bta-miR-34b	3	9	5.02588
168	bta-miR-320a	97	337	5.08104		168	bta-miR-34b	1	1	-0.57738			168	bta-miR-34c	3	3	3.92727
169	bta-miR-324	6	19	2.2054		169	bta-miR-34c	2	2	0.11576			169	bta-miR-361	9	14	5.46772
170	bta-miR-326	21	120	4.04845		170	bta-miR-3601	4	4	0.80891			170	bta-miR-3613	2	2	3.52181
171	bta-miR-328	1	1	-0.73904		171	bta-miR-361	10	44	3.20681			171	bta-miR-362-3p	3	3	3.92727
172	bta-miR-330	5	12	1.74586		172	bta-miR-3613	6	13	1.98757			172	bta-miR-362-5p	1	1	2.82866
173	bta-miR-331-3p	7	15	1.96901		173	bta-miR-362-3p	1	2	0.11576			173	bta-miR-363	7	31	6.26265
174	bta-miR-331-5p	3	5	0.8704		174	bta-miR-362-5p	2	2	0.11576			174	bta-miR-365-3p	2	2	3.52181
175	bta-miR-335	1	1	-0.73904		175	bta-miR-363	3	3	0.52123			175	bta-miR-374a	11	34	6.35502
176	bta-miR-338	3	6	1.05272		176	bta-miR-365-3p	3	14	2.06167			176	bta-miR-374b	37	759	9.46066
177	bta-miR-339a	53	783	5.92409		177	bta-miR-374a	5	25	2.64149			177	bta-miR-375	1	1	2.82866
178	bta-miR-33a	8	35	2.81631		178	bta-miR-374b	20	330	5.22171			178	bta-miR-376e	2	3	3.92727
179	bta-miR-340	2	4	0.64725		179	bta-miR-375	3	5	1.03205			179	bta-miR-378	11	55	6.83599
180	bta-miR-342	156	4023	7.56074		180	bta-miR-376e	1	2	0.11576			180	bta-miR-378b	1	1	2.82866
181	bta-miR-3432	7	11	1.65885		181	bta-miR-378	16	105	4.07658			181	bta-miR-378c	2	3	3.92727
182	bta-miR-345-3p	2	2	-0.04589		182	bta-miR-379	1	1	-0.57738			182	bta-miR-379	2	3	3.92727
183	bta-miR-345-5p	19	153	4.2914		183	bta-miR-409a	1	1	-0.57738			183	bta-miR-411a	3	4	4.21495
184	bta-miR-34a	4	11	1.65885		184	bta-miR-421	16	48	3.29382			184	bta-miR-421	10	15	5.53671
185	bta-miR-34b	2	2	-0.04589		185	bta-miR-423-3p	42	316	5.17836			185	bta-miR-423-3p	55	263	8.40081
186	bta-miR-34c	2	2	-0.04589		186	bta-miR-423-5p	22	221	4.82078			186	bta-miR-423-5p	37	211	8.18052
187	bta-miR-3601	1	1	-0.73904		187	bta-miR-425-3p	6	7	1.36853			187	bta-miR-424-5p	1	1	2.82866
188	bta-miR-361	14	57	3.30401		188	bta-miR-425-5p	15	74	3.72668			188	bta-miR-425-3p	3	3	3.92727
189	bta-miR-3613	5	19	2.2054		189	bta-miR-449a	1	2	0.11576			189	bta-miR-425-5p	32	101	7.44378
190	bta-miR-362-3p	1	2	-0.04589		190	bta-miR-451	3	14	2.06167			190	bta-miR-4286	15	167	7.94665
191	bta-miR-362-5p	3	3	0.35957		191	bta-miR-454	4	10	1.7252			191	bta-miR-451	10	30	6.22986
192	bta-miR-363	5	7	1.20687		192	bta-miR-455-3p	2	5	1.03205			192	bta-miR-454	7	19	5.7731
193	bta-miR-365-3p	8	24	2.43901		193	bta-miR-484	38	346	5.26905			193	bta-miR-455-3p	4	12	5.31357
194	bta-miR-369-3p	1	1	-0.73904		194	bta-miR-485	1	1	-0.57738			194	bta-miR-484	35	339	8.65466
195	bta-miR-374a	7	28	2.59316		195	bta-miR-486	6	13	1.98757			195	bta-miR-486	7	12	5.31357
196	bta-miR-374b	29	368	5.16904		196	bta-miR-487b	1	1	-0.57738			196	bta-miR-487b	1	1	2.82866
197	bta-miR-375	4	6	1.05272		197	bta-miR-491	5	7	1.36853			197	bta-miR-491	3	6	4.62042
198	bta-miR-376d	1	1	-0.73904		198	bta-miR-494	1	5	1.03205			198	bta-miR-494	4	4	4.21495
199	bta-miR-376e	3	7	1.20687		199	bta-miR-500	3	3	0.52123			199	bta-miR-497	1	2	3.52181
200	bta-miR-378	23	158	4.32355		200	bta-miR-502a	1	1	-0.57738			200	bta-miR-500	1	1	2.82866
201	bta-miR-378c	1	1	-0.73904		201	bta-miR-505	8	26	2.68071			201	bta-miR-502a	2	2	3.52181
202	bta-miR-379	2	2	-0.04589		202	bta-miR-545-3p	10	74	3.72668			202	bta-miR-505	10	25	6.04754
203	bta-miR-409a	1	1	-0.73904		203	bta-miR-545-5p	1	2	0.11576			203	bta-miR-532	3	5	4.4381
204	bta-miR-411a	1	1	-0.73904		204	bta-miR-574	3	4	0.80891			204	bta-miR-545-3p	15	61	6.93953
205	bta-miR-421	19	51	3.19278		205	bta-miR-6119-3p	6	28	2.75482			205	bta-miR-545-5p	1	5	4.4381
206	bta-miR-423-3p	46	328	5.05397		206	bta-miR-6119-5p	13	205	4.74563			206	bta-miR-574	5	5	4.4381
207	bta-miR-423-5p	39	303	4.97469		207	bta-miR-6123	2	3	0.52123			207	bta-miR-6119-3p	10	27	6.1245
208	bta-miR-425-3p	9	10	1.56354		208	bta-miR-628	1	3	0.52123			208	bta-miR-6119-5p	49	373	8.75024
209	bta-miR-425-5p	21	80	3.64298		209	bta-miR-6517	3	3	0.52123			209	bta-miR-6123	2	2	3.52181
210	bta-miR-4286	15	161	4.34236		210	bta-miR-652	11	99	4.01774			210	bta-miR-628	2	3	3.92727
211	bta-miR-449a	1	2	-0.04589		211	bta-miR-6531	8	8	1.50206			211	bta-miR-6516	1	1	2.82866
212	bta-miR-450b	1	1	-0.73904		212	bta-miR-660	5	78	3.77932			212	bta-miR-652	23	197	8.11186
213	bta-miR-451	4	23	2.39645		213	bta-miR-664b	6	9	1.61984			213	bta-miR-6520	1	1	2.82866
214	bta-miR-454	5	12	1.74586		214	bta-miR-671	8	12	1.90752			214	bta-miR-6524	2	5	4.4381
215	bta-miR-455-3p	5	10	1.56354		215	bta-miR-677	15	468	5.57108			215	bta-miR-6529	7	23	5.96415
216	bta-miR-484	55	418	5.29644		216	bta-miR-7	11	48	3.29382			216	bta-miR-660	12	91	7.33952
217	bta-miR-485	1	1	-0.73904		217	bta-miR-744	11	48	3.29382			217	bta-miR-664b	9	11	5.22656
218	bta-miR-486	11	24	2.43901		218	bta-miR-760-3p	1	1	-0.57738			218	bta-miR-671	3	3	3.92727
219	bta-miR-487b	2	2	-0.04589		219	bta-miR-769	6	7	1.36853			219	bta-miR-7	11	40	6.51754
220	bta-miR-491	6	10	1.56354		220	bta-miR-877	1	1	-0.57738			220	bta-miR-744	16	54	6.81764
221	bta-miR-494	2	6	1.05272		221	bta-miR-92a	19	148	4.41983			221	bta-miR-769	9	18	5.71903
222	bta-miR-497	1	1	-0.73904		222	bta-miR-92b	8	9	1.61984			222	bta-miR-7859	2	2	3.52181
223	bta-miR-499	2	2	-0.04589		223	bta-miR-93	22	420	5.46287			223	bta-miR-877	1	1	2.82866
224	bta-miR-500	3	3	0.35957		224	bta-miR-95	1	2	0.11576			224	bta-miR-92a	11	46	6.6573
225	bta-miR-502a	1	1	-0.73904		225	bta-miR-98	4	30	2.82381			225	bta-miR-92b	5	6	4.62042
226	bta-miR-503-3p	1	1	-0.73904		226	bta-miR-99a-3p	2	2	0.11576			226	bta-miR-93	33	213	8.18995
227	bta-miR-503-5p	1	1	-0.73904		227	bta-miR-99a-5p	9	101	4.03774			227	bta-miR-95	3	3	3.92727
228	bta-miR-505	17	40	2.94984		228	bta-miR-99b	3	22	2.51366			228	bta-miR-9-5p	3	5	4.4381
229	bta-miR-545-3p	13	78	3.61767									229	bta-miR-98	20	130	7.69619
230	bta-miR-545-5p	3	5	0.8704									230	bta-miR-99a-3p	4	5	4.4381
231	bta-miR-574	4	6	1.05272									231	bta-miR-99a-5p	20	179	8.01605
232	bta-miR-6119-3p	8	42	2.99863									232	bta-miR-99b	9	43	6.58986
233	bta-miR-6119-5p	17	235	4.72054
234	bta-miR-6123	3	5	0.8704
235	bta-miR-628	2	4	0.64725
236	bta-miR-6517	4	5	0.8704
237	bta-miR-652	15	115	4.00589
238	bta-miR-6524	2	2	-0.04589
239	bta-miR-6529	4	17	2.09417
240	bta-miR-6531	6	6	1.05272
241	bta-miR-660	9	87	3.72687
242	bta-miR-664b	7	10	1.56354
243	bta-miR-671	7	11	1.65885
244	bta-miR-677	13	14	1.90002
245	bta-miR-7	16	54	3.24994
246	bta-miR-744	15	64	3.41984
247	bta-miR-760-3p	2	2	-0.04589
248	bta-miR-769	12	16	2.03355
249	bta-miR-7859	2	2	-0.04589
250	bta-miR-92a	22	151	4.27824
251	bta-miR-92b	11	12	1.74586
252	bta-miR-93	36	492	5.45944
253	bta-miR-95	1	2	-0.04589
254	bta-miR-9-5p	3	3	0.35957
255	bta-miR-98	13	67	3.46565
256	bta-miR-99a-3p	3	3	0.35957
257	bta-miR-99a-5p	19	222	4.66364
258	bta-miR-99b	7	40	2.94984
